# Supplementary material
Source: publisher site journal article supplement (https://www.dovepress.com/article/270099)
Supplement: Supplementary file 1 [file get_supplementary_file.php]

## S1-Table 1 search strategy

# 1 TS=lung cancer

# 2 TS=lung carcinoma

# 3 TS=lung neoplasms

# 4 TS=pulmonary neoplasm

# 5 TS=cancer of lung

# 6 #5 OR #4 OR #3 OR #2 OR #1

# 7 TS=PD1

# 8 TS=PD-1

# 9 TS=PD-L1

# 10 TS=anti-PD1

# 11 TS=anti-PD-1

# 12 TS=anti-PD-L1

# 13 TS=PD1/PD-L1

# 14 TS=PD-1/PD-L1

# 15 TS=anti-PD-1/PD-L1

# 16 TS=atezolizumab

# 17 TS=avelumab

# 18 TS=durvalumab

# 19 TS=nivolumab

# 20 TS=pembrolizumab

# 21 #20 OR #19 OR #18 OR #17 OR #16 OR #15 OR #14 OR #13 OR #12 OR #11 OR #10 OR #9 OR #8 OR #7

#21 AND #6

**S2-Table 2 Top 100 cited articles**

| Rank | Publication                                                                                                                                                                                           | Cited Frequencies | Year | Average Cited Frequencies/Year |
|------|-------------------------------------------------------------------------------------------------------------------------------------------------------------------------------------------------------|-------------------|------|--------------------------------|
| 1    | Safety, Activity, and Immune Correlates of Anti-PD-1 Antibody in Cancer                                                                                                                               | 6248              | 2012 | 893                            |
| 2    | Safety and Activity of Anti-PD-L1 Antibody in Patients with Advanced Cancer                                                                                                                           | 3990              | 2012 | 570                            |
| 3    | Nivolumab versus Docetaxel in Advanced Nonsquamous Non-Small-Cell Lung Cancer                                                                                                                         | 3580              | 2015 | 895                            |
| 4    | Nivolumab versus Docetaxel in Advanced Squamous-Cell Non-Small-Cell Lung Cancer                                                                                                                       | 3546              | 2015 | 887                            |
| 5    | Mutational landscape determines sensitivity to PD-1 blockade in non-small cell lung cancer                                                                                                            | 3016              | 2015 | 754                            |
| 6    | Pembrolizumab versus Chemotherapy for PD-L1-Positive Non-Small-Cell Lung Cancer                                                                                                                       | 2660              | 2016 | 887                            |
| 7    | Tumor-associated B7-H1 promotes T-cell apoptosis: A potential mechanism of immune evasion                                                                                                             | 2541              | 2002 | 149                            |
| 8    | Pembrolizumab for the Treatment of Non-Small-Cell Lung Cancer                                                                                                                                         | 2497              | 2015 | 624                            |
| 9    | Pembrolizumab versus docetaxel for previously treated, PD-L1-positive, advanced non-small-cell lung cancer (KEYNOTE-010): a randomised controlled trial                                               | 2209              | 2016 | 736                            |
| 10   | Phase I Study of Single-Agent Anti-Programmed Death-1 (MDX-1106) in Refractory Solid Tumors: Safety, Clinical Activity, Pharmacodynamics, and Immunologic Correlates                                  | 1587              | 2010 | 176                            |
| 11   | Atezolizumab in patients with locally advanced and metastatic urothelial carcinoma who have progressed following treatment with platinum-based chemotherapy: a single-arm, multicentre, phase 2 trial | 1374              | 2016 | 458                            |
| 12   | Atezolizumab versus docetaxel in patients with previously treated non-small-cell lung cancer (OAK): a phase 3, open-label, multicentre randomised controlled trial                                    | 1280              | 2017 | 640                            |
| 13   | Survival, Durable Tumor Remission, and Long-Term Safety in Patients With Advanced Melanoma Receiving Nivolumab                                                                                        | 1265              | 2014 | 253                            |
| 14   | Mismatch repair deficiency predicts response of solid tumors to PD-1 blockade                                                                                                                         | 1246              | 2017 | 623                            |
| 15   | Nivolumab for Recurrent Squamous-Cell Carcinoma of the Head and Neck                                                                                                                                  | 1198              | 2016 | 399                            |
| 16   | Association of PD-1, PD-1 Ligands, and Other Features of the Tumor Immune Microenvironment with Response to Anti-PD-1                                                                                 | 1135              | 2014 | 227                            |

## Therapy

|    |                                                                                                                                                                                                     |      |      |     |
|----|-----------------------------------------------------------------------------------------------------------------------------------------------------------------------------------------------------|------|------|-----|
| 17 | Atezolizumab versus docetaxel for patients with previously treated non-small-cell lung cancer (POPLAR): a multicentre, open-label, phase 2 randomised controlled trial                              | 1074 | 2016 | 358 |
| 18 | Immune Checkpoint Blockade in Cancer Therapy                                                                                                                                                        | 1001 | 2015 | 250 |
| 19 | Clonal neoantigens elicit T cell immunoreactivity and sensitivity to immune checkpoint blockade                                                                                                     | 934  | 2016 | 311 |
| 20 | Inhibitory B7-family molecules in the tumour microenvironment                                                                                                                                       | 875  | 2008 | 80  |
| 21 | Pembrolizumab plus Chemotherapy in Metastatic Non-Small-Cell Lung Cancer                                                                                                                            | 828  | 2018 | 828 |
| 22 | Durvalumab after Chemoradiotherapy in Stage III Non-Small-Cell Lung Cancer                                                                                                                          | 801  | 2017 | 401 |
| 23 | Activity and safety of nivolumab, an anti-PD-1 immune checkpoint inhibitor, for patients with advanced, refractory squamous non-small-cell lung cancer (CheckMate 063): a phase 2, single-arm trial | 781  | 2015 | 195 |
| 24 | Nivolumab in patients with advanced hepatocellular carcinoma (CheckMate 040): an open-label, non-comparative, phase 1/2 dose escalation and expansion trial                                         | 765  | 2017 | 383 |
| 25 | Elements of cancer immunity and the cancer-immune set point                                                                                                                                         | 728  | 2017 | 364 |
| 26 | Mechanism-driven biomarkers to guide immune checkpoint blockade in cancer therapy                                                                                                                   | 713  | 2016 | 238 |
| 27 | Gut microbiome influences efficacy of PD-1-based immunotherapy against epithelial tumors                                                                                                            | 683  | 2018 | 683 |
| 28 | First-Line Nivolumab in Stage IV or Recurrent Non-Small-Cell Lung Cancer                                                                                                                            | 670  | 2017 | 335 |
| 29 | Nivolumab plus Ipilimumab in Lung Cancer with a High Tumor Mutational Burden                                                                                                                        | 654  | 2018 | 654 |
| 30 | PD-L1 (B7-H1) and PD-1 pathway blockade for cancer therapy: Mechanisms, response biomarkers, and combinations                                                                                       | 628  | 2016 | 209 |
| 31 | PD-L1 Expression as a Predictive Biomarker in Cancer Immunotherapy                                                                                                                                  | 617  | 2015 | 154 |
| 32 | Immune-related adverse events with immune checkpoint blockade: a comprehensive review                                                                                                               | 613  | 2016 | 204 |
| 33 | Carboplatin and pemetrexed with or without pembrolizumab for advanced, non-squamous non-small-cell lung cancer: a randomised, phase 2 cohort of the open-label KEYNOTE-021 study                    | 606  | 2016 | 202 |
| 34 | Activation of the PD-1 Pathway Contributes to Immune Escape in EGFR-Driven Lung Tumors                                                                                                              | 583  | 2013 | 97  |
| 35 | Overall Survival and Long-Term Safety of Nivolumab (Anti-Programmed Death 1 Antibody, BMS-936558, ONO-4538) in Patients With Previously Treated Advanced Non-Small-Cell Lung Cancer                 | 502  | 2015 | 126 |
| 36 | B7-h1 expression on non-small cell lung cancer cells and its relationship with tumor-infiltrating lymphocytes and their PD-1 expression                                                             | 492  | 2004 | 33  |

|    |                                                                                                                                                                                       |     |      |     |
|----|---------------------------------------------------------------------------------------------------------------------------------------------------------------------------------------|-----|------|-----|
| 38 | Atezolizumab for First-Line Treatment of Metastatic Nonsquamous NSCLC                                                                                                                 | 477 | 2018 | 477 |
| 37 | Programmed death ligand-1 expression in non-small cell lung cancer                                                                                                                    | 477 | 2014 | 95  |
| 39 | PD-L1 Immunohistochemistry Assays for Lung Cancer: Results from Phase 1 of the Blueprint PD-L1 IHC Assay Comparison Project                                                           | 472 | 2017 | 236 |
| 40 | Toxicities of the anti-PD-1 and anti-PD-L1 immune checkpoint antibodies                                                                                                               | 469 | 2015 | 117 |
| 41 | Nivolumab alone and nivolumab plus ipilimumab in recurrent small-cell lung cancer (CheckMate 032): a multicentre, open-label, phase 1/2 trial                                         | 438 | 2016 | 146 |
| 42 | CTLA-4 and PD-1 Pathways Similarities, Differences, and Implications of Their Inhibition                                                                                              | 436 | 2016 | 145 |
| 43 | Immunological Effects of Conventional Chemotherapy and Targeted Anticancer Agents                                                                                                     | 433 | 2015 | 108 |
| 44 | Inhibiting DNA Methylation Causes an Interferon Response in Cancer via dsRNA Including Endogenous Retroviruses                                                                        | 432 | 2015 | 108 |
| 45 | Adaptive resistance to therapeutic PD-1 blockade is associated with upregulation of alternative immune checkpoints                                                                    | 414 | 2016 | 138 |
| 46 | IFN-gamma-related mRNA profile predicts clinical response to PD-1 blockade                                                                                                            | 404 | 2017 | 202 |
| 47 | Non-Small Cell Lung Cancer, Version 5.2017 Clinical Practice Guidelines in Oncology                                                                                                   | 398 | 2017 | 199 |
| 48 | Nivolumab plus ipilimumab as first-line treatment for advanced non-small-cell lung cancer (CheckMate 012): results of an open-label, phase 1, multicohort study                       | 377 | 2017 | 189 |
| 49 | Safety and Efficacy of Durvalumab (MEDI4736), an Anti-Programmed Cell Death Ligand-1 Immune Checkpoint Inhibitor, in Patients With Advanced Urothelial Bladder Cancer                 | 374 | 2016 | 125 |
| 50 | The B7-H1 (PD-L1) T lymphocyte-inhibitory molecule is expressed in breast cancer patients with infiltrating ductal carcinoma: Correlation with important high-risk prognostic factors | 371 | 2006 | 29  |
| 51 | Management of toxicities from immunotherapy: ESMO Clinical Practice Guidelines for diagnosis, treatment and follow-up                                                                 | 366 | 2017 | 183 |
| 52 | Tumor Mutational Burden as an Independent Predictor of Response to Immunotherapy in Diverse Cancers                                                                                   | 366 | 2017 | 183 |
| 53 | Pembrolizumab for patients with melanoma or non-small-cell lung cancer and untreated brain metastases: early analysis of a non-randomised, open-label, phase 2 trial                  | 364 | 2016 | 121 |
| 54 | iRECIST: guidelines for response criteria for use in trials testing immunotherapeutics                                                                                                | 357 | 2017 | 179 |
| 55 | High expression of PD-L1 in lung cancer may contribute to poor prognosis and tumor cells immune escape through suppressing tumor infiltrating dendritic cells maturation              | 352 | 2011 | 44  |
| 56 | Quantitative Assessment of the Heterogeneity of PD-L1 Expression in Non-Small-Cell Lung Cancer                                                                                        | 348 | 2016 | 116 |

|    |                                                                                                                                                                                   |     |      |     |
|----|-----------------------------------------------------------------------------------------------------------------------------------------------------------------------------------|-----|------|-----|
| 57 | EGFR Mutations and ALK Rearrangements Are Associated with Low Response Rates to PD-1 Pathway Blockade in Non-Small Cell Lung Cancer: A Retrospective Analysis                     | 329 | 2016 | 110 |
| 58 | Hyperprogressive Disease Is a New Pattern of Progression in Cancer Patients Treated by Anti-PD-1/PD-L1                                                                            | 326 | 2017 | 163 |
| 59 | Metastasis is regulated via microRNA-200/ZEB1 axis control of tumour cell PD-L1 expression and intratumoral immunosuppression                                                     | 325 | 2014 | 65  |
| 60 | Pembrolizumab plus Chemotherapy for Squamous Non-Small-Cell Lung Cancer                                                                                                           | 322 | 2018 | 322 |
| 61 | Association of PD-L1 overexpression with activating EGFR mutations in surgically resected nonsmall- cell lung cancer                                                              | 318 | 2014 | 64  |
| 62 | Antagonist Antibodies to PD-1 and B7-H1 (PD-L1) in the Treatment of Advanced Human Cancer                                                                                         | 315 | 2013 | 53  |
| 63 | PD-1 expression by tumour-associated macrophages inhibits phagocytosis and tumour immunity                                                                                        | 314 | 2017 | 157 |
| 64 | Management of toxicities of immune checkpoint inhibitors                                                                                                                          | 305 | 2016 | 102 |
| 66 | PD-1 and PD-L1 expression in molecularly selected non-small-cell lung cancer patients                                                                                             | 303 | 2015 | 76  |
| 65 | Intratumoral CD4(+)CD25(+) regulatory T-cell-mediated suppression of infiltrating CD4(+) T cells in B-cell non-Hodgkin lymphoma                                                   | 303 | 2006 | 23  |
| 67 | Safety and antitumour activity of durvalumab plus tremelimumab in non-small-cell lung cancer: a multicentre, phase 1b study                                                       | 299 | 2016 | 100 |
| 68 | T-Cell Transfer Therapy Targeting Mutant KRAS in Cancer                                                                                                                           | 295 | 2016 | 98  |
| 69 | Management of immune checkpoint blockade dysimmune toxicities: a collaborative position paper                                                                                     | 288 | 2016 | 96  |
| 70 | Managing toxicities associated with immune checkpoint inhibitors: consensus recommendations from the Society for Immunotherapy of Cancer (SITC) Toxicity Management Working Group | 282 | 2017 | 141 |
| 71 | PD-1 and PD-L1 Checkpoint Signaling Inhibition for Cancer Immunotherapy: Mechanism, Combinations, and Clinical Outcome                                                            | 277 | 2017 | 139 |
| 72 | Molecular Pathways: Next-Generation Immunotherapy-Inhibiting Programmed Death-Ligand 1 and Programmed Death-1                                                                     | 274 | 2012 | 39  |
| 73 | Immune Checkpoint Inhibition for Hypermutant Glioblastoma Multiforme Resulting From Germline Biallelic Mismatch Repair Deficiency                                                 | 273 | 2016 | 91  |
| 74 | Nivolumab monotherapy in recurrent metastatic urothelial carcinoma (CheckMate 032): a multicentre, open-label, two-stage, multi-arm, phase 1/2 trial                              | 270 | 2016 | 90  |
| 75 | A Prospective, Multi-institutional, Pathologist-Based Assessment of 4 Immunohistochemistry Assays for PD-L1 Expression in Non-Small Cell Lung Cancer                              | 269 | 2017 | 135 |
| 76 | Overall Survival with Durvalumab after Chemoradiotherapy in Stage III NSCLC                                                                                                       | 267 | 2018 | 267 |
| 77 | Immunogenic Chemotherapy Sensitizes Tumors to Checkpoint Blockade Therapy                                                                                                         | 263 | 2016 | 88  |

|    |                                                                                                                                                                                                                           |     |      |     |
|----|---------------------------------------------------------------------------------------------------------------------------------------------------------------------------------------------------------------------------|-----|------|-----|
| 78 | Checkpoint Inhibitors in Metastatic EGFR-Mutated Non-Small Cell Lung Cancer A Meta-Analysis                                                                                                                               | 259 | 2017 | 130 |
| 79 | In Situ Tumor PD-L1 mRNA Expression Is Associated with Increased TILs and Better Outcome in Breast Carcinomas                                                                                                             | 254 | 2014 | 51  |
| 80 | Differential Activity of Nivolumab, Pembrolizumab and MPDL3280A according to the Tumor Expression of Programmed Death-Ligand-1 (PD-L1): Sensitivity Analysis of Trials in Melanoma, Lung and Genitourinary Cancers        | 252 | 2015 | 63  |
| 81 | Neoadjuvant PD-1 Blockade in Resectable Lung Cancer                                                                                                                                                                       | 249 | 2018 | 249 |
| 82 | Tumor and Microenvironment Evolution during Immunotherapy with Nivolumab                                                                                                                                                  | 241 | 2017 | 121 |
| 83 | Pneumonitis in Patients Treated With Anti-Programmed Death-1/Programmed Death Ligand 1 Therapy                                                                                                                            | 241 | 2017 | 121 |
| 84 | Co-occurring Genomic Alterations Define Major Subsets of KRAS-Mutant Lung Adenocarcinoma with Distinct Biology, Immune Profiles, and Therapeutic Vulnerabilities                                                          | 237 | 2015 | 59  |
| 85 | PD-1 blockade inhibits hematogenous spread of poorly immunogenic tumor cells by enhanced recruitment of effector T cells                                                                                                  | 237 | 2005 | 17  |
| 86 | The biology and management of non-small cell lung cancer                                                                                                                                                                  | 236 | 2018 | 236 |
| 87 | Rescue of exhausted CD8 T cells by PD-1-targeted therapies is CD28-dependent                                                                                                                                              | 236 | 2017 | 118 |
| 88 | Upregulation of PD-L1 by EGFR Activation Mediates the Immune Escape in EGFR-Driven NSCLC Implication for Optional Immune Targeted Therapy for NSCLC Patients with EGFR Mutation                                           | 235 | 2015 | 59  |
| 89 | Comparative study of the PD-L1 status between surgically resected specimens and matched biopsies of NSCLC patients reveal major discordances: a potential issue for anti-PD-L1 therapeutic strategies                     | 232 | 2016 | 77  |
| 90 | Anti-PD-1 therapy in patients with advanced melanoma and preexisting autoimmune disorders or major toxicity with ipilimumab                                                                                               | 231 | 2017 | 116 |
| 92 | Molecular Determinants of Response to Anti-Programmed Cell Death (PD)-1 and Anti-Programmed Death-Ligand 1 (PD-L1) Blockade in Patients With Non-Small-Cell Lung Cancer Profiled With Targeted Next-Generation Sequencing | 228 | 2018 | 228 |
| 91 | The Next Immune-Checkpoint Inhibitors: PD-1/PD-L1 Blockade in Melanoma                                                                                                                                                    | 228 | 2015 | 57  |
| 93 | The immune contexture in cancer prognosis and treatment                                                                                                                                                                   | 226 | 2017 | 113 |
| 94 | Microsatellite Instability as a Biomarker for PD-1 Blockade                                                                                                                                                               | 225 | 2016 | 75  |
| 95 | Previous radiotherapy and the clinical activity and toxicity of pembrolizumab in the treatment of non-small-cell lung cancer: a secondary analysis of the KEYNOTE-001 phase 1 trial                                       | 220 | 2017 | 110 |
| 97 | Human cancer immunotherapy with antibodies to the PD-1 and PD-L1 pathway                                                                                                                                                  | 220 | 2015 | 55  |
| 96 | B7-H3 and B7-H4 expression in non-small-cell lung cancer                                                                                                                                                                  | 220 | 2006 | 17  |

|     |                                                                                                                          |     |      |    |
|-----|--------------------------------------------------------------------------------------------------------------------------|-----|------|----|
| 98  | Neurological, respiratory, musculoskeletal, cardiac and ocular side-effects of anti-PD-1 therapy                         | 219 | 2016 | 73 |
| 99  | Breathing new life into immunotherapy: review of melanoma, lung and kidney cancer                                        | 219 | 2014 | 44 |
| 100 | Programmed Cell Death 1 (PD-1) and Its Ligand (PD-L1) in Common Cancers and Their Correlation with Molecular Cancer Type | 218 | 2014 | 44 |

---
